# Supplementary material
Source: PubMed Central journal article supplement (PMC9444972)
Supplement: NIHMS1827721-supplement-Major_Resources_Table.pdf [file NIHMS1827721-supplement-Major_Resources_Table.pdf]

## Major Resources Table

In order to allow validation and replication of experiments, all essential research materials listed in the Methods should be included in the Major Resources Table below. Authors are encouraged to use public repositories for protocols, data, code, and other materials and provide persistent identifiers and/or links to repositories when available. Authors may add or delete rows as needed.

### Animals (in vivo studies)

| Species | Vendor or Source | Background Strain | Sex  | Persistent ID / URL |
|---------|------------------|-------------------|------|---------------------|
| Mouse   | Original         | C57BL/6, inbred   | Both | N/A                 |
|         |                  |                   |      |                     |
|         |                  |                   |      |                     |

### Genetically Modified Animals

|                        | Species | Vendor or Source | Background Strain | Other Information   | Persistent ID / URL |
|------------------------|---------|------------------|-------------------|---------------------|---------------------|
| <b>Parent - Male</b>   | Mouse   | Original         | C57BL/6           | CRISPR/Cas9, inbred | N/A                 |
| <b>Parent - Female</b> | Mouse   | Original         | C57BL/6           | CRISPR/Cas9, inbred | N/A                 |

### Antibodies

| Target antigen                   | Vendor or Source                    | Catalog #   | Working concentration | Lot # (preferred but not required) | Persistent ID / URL |
|----------------------------------|-------------------------------------|-------------|-----------------------|------------------------------------|---------------------|
| ARRDC4                           | Abcam                               | ab139670    | 1:500-1:1000          |                                    |                     |
| ARRDC4                           | Thermo Fisher scientific            | PA5-38852   | 1:500-1:1000          |                                    |                     |
| GLUT1                            | Abcam                               | ab115730    | 1:1000 or 1:400       |                                    |                     |
| mCherry                          | Abcam                               | ab167453    | 1:1000                |                                    |                     |
| HA-tag                           | Abcam                               | ab9110      | 1:1000-1:2000         |                                    |                     |
| HA-tag                           | MBL                                 | M180-7      | 1:2000                |                                    |                     |
| FLAG-tag                         | Abcam                               | ab1162      | 1:2000-1:4000         |                                    |                     |
| FLAG-tag                         | MBL                                 | M185-7      | 1:2000-1:4000         |                                    |                     |
| ATF4                             | Cell Signaling Technology           | 11815       | 1:1000                |                                    |                     |
| CHOP                             | Cell Signaling Technology           | 2895        | 1:1000                |                                    |                     |
| GAPDH                            | Cell Signaling Technology           | 8884        | 1:1000                |                                    |                     |
| Concanavalin A                   | Thermo Fisher scientific            | C11252      | 1:400                 |                                    |                     |
| P-cadherin                       | Abcam                               | ab51034     | 1:10000               |                                    |                     |
| Clathrin                         | Cell Signaling Technology           | 4796        | 1:400                 |                                    |                     |
| AP2M1                            | Abcam                               | ab233712    | 1:400                 |                                    |                     |
| Sarcomeric Alpha Actinin         | Abcam                               | ab68167     | 1:400                 |                                    |                     |
| Anti-Mouse IgG, Alexa Fluor 405  | Abcam                               | ab175660    | 1:600                 |                                    |                     |
| Anti-Rabbit IgG, Alexa Fluor 488 | Abcam                               | ab150077    | 1:600                 |                                    |                     |
| Anti-Mouse IgG, AMCA             | Jackson ImmunoResearch Laboratories | 715-155-151 | 1:600                 |                                    |                     |

|                             |                                     |             |        |  |  |
|-----------------------------|-------------------------------------|-------------|--------|--|--|
| Anti-Rabbit IgG, AMCA       | Jackson ImmunoResearch Laboratories | 711-155-152 | 1:600  |  |  |
| Anti-Mouse IgG-HRP          | Bio-rad                             | 1721011     | 1:8000 |  |  |
| Anti-Rabbit IgG-HRP         | Bio-rad                             | 1721019     | 1:8000 |  |  |
| Rabbit IgG, Isotype Control | Abcam                               | ab172730    | 1:1000 |  |  |

**DNA/cDNA Clones**

| Clone Name      | Sequence                                                                                                                                                                                                                                                                                                                                                                                                                                                                                                                                                                                                                                                                                                                                                                                                                                                                                                                                                                                                                                                                                                                                                                                                                                                                                                                                                                         | Source / Repository      | Persistent ID / URL |
|-----------------|----------------------------------------------------------------------------------------------------------------------------------------------------------------------------------------------------------------------------------------------------------------------------------------------------------------------------------------------------------------------------------------------------------------------------------------------------------------------------------------------------------------------------------------------------------------------------------------------------------------------------------------------------------------------------------------------------------------------------------------------------------------------------------------------------------------------------------------------------------------------------------------------------------------------------------------------------------------------------------------------------------------------------------------------------------------------------------------------------------------------------------------------------------------------------------------------------------------------------------------------------------------------------------------------------------------------------------------------------------------------------------|--------------------------|---------------------|
| Human ARRDC1 WT | ATGGGGCGAGTGCAGCTCTTCGAGATCAGCCTGAGCCACGGCCGCTCGTCTACAGCCCCGGGAGCCGT<br>TGGCTGGGACCGTGCAGCTGCAGCTGGGGGACCGCTGCCGTTCAGGACCATCCGGGTGACCTGCATAGG<br>TTCTGCGGGGTCTCCAACAAGGCTAATGACACAGCGTGGGTAGTGGAGGAGGGTTACTTCAACAGTTC<br>CTGTGCTGGCAGACAAGGGGAGCCTGCCCGTGGAGAGCACAGCTTCCCTTCCAGTTCTGCTTCTG<br>CCACTGCACCCACGCTCTTTGAGGGTCTTTTCGGGAAGATCGTGACCCAGGTGAGGGCCGCCATCCACAC<br>GCCACGGTTTTCAAGGATCACAAGTGCAGCCTCGTGTCTATATCTTGAGCCCTTGAACCTGAACAGC<br>ATCCAGACATTGAGCAACCAACGTGGCCTCTGCCACCAAGAAGTTCTCTACAAGCTGGTGAAGACGG<br>GCAGCGTGGTCTCACAGCCAGCACTGATCTCCGCGGCTATGTGGTGGGGCAGGCACTGCAGCTGCATGC<br>CGACGTTGAGAACCAGTCAAGCAAGGACACCAGCCCTGGTGGCCAGTCTGTGCAGAAAGTGTCTAT<br>AAGGCCAAGCGCTGGATCCACGACGTACGGACATTGCGGAGGTGGAGGGTGGGGGCGTCAAGGCCTGGC<br>GGCGGGCGCAGTGGCAGCAGCAGATCTGGTGCCTGCTTGCCTGCCCCAGTCGGCCCTGCCGGGCTGCAGCCT<br>CATCCACATCGACTACTACTTACAGGTCTCTCTGAAGGCGCCGGAAGCTACTGTGACCTCCCGGTCTTC<br>ATTGGCAATATTGCTGTGAACCATGCCCAAGTGCAGCCCCGGCCAGGCTGGGGCTGCCTCTGGGGGCC<br>CACCCCTGGTGGTGCCTTCCGACACCCAGGAGGAGGTGAGGCTGAGGCTGCGGCTGGCGGCCCCCA<br>CTTCTTGACCCCGTCTTCTCTCCACCAAGAGCCATTGCAGCGCAGCCCTGCTGCCACCTTGAAGT<br>TCTGTGCTGGTGCAGCCGAGCCCTGCCCTCAGGATGGCAGCCCTGCCTCACACCCGCTGCACCTCCCT<br>TGTGCATTTCAACAGGTGCCACTGTCCCTACTTTGCAGAGGGCTCCGGGGGGCAGTGCCCACTACCAG<br>CACCTGATTCTCCTCCAGAGTACAGTTCTGGGGTACCCCTATGAGGCCACCCGCTTATGAGCAG<br>AGTGTGGCGCGCTGGAACCCAGCCTGACCCCTGAGAGC | NCBI Nucleotide database | NM_152285           |
| Human ARRDC2 WT | ATGCTATTCGACAAGGTGAAAGCGTTCTCGGTGCAAGTGGACGGCGCAGCCGCGGGCGTGCAGCCCGTGT<br>TTAGCGGCGGCCAGCCGTGGCGGGCGGGTCTGCTGAGCTGTCAAGCGCCGCGCTGTGGGTGCCCT<br>GAGGTGCGCGCGCGGGGCCGCCCCAGTGCATGGACCGAGTGCAGCAGCGGGGCTCGAGCAGCGGCT<br>TACACGCAGAGCTACAGTGAACCGTGGAGTCTGAGCCACCGCCACGCTCTGGCGCCAGATACCG<br>GGGAGACCACGAGCTGCTCCTGGGCGCCATGAGTTCTGTTGAGCTCCAGCTGCCCCGACCCCTGGT<br>GACATCCTCGAGGGCAAACCGGTAGTGTCCGCTACTGTATCAAGGCCACCCCTGCACCGGCCCTGGGTC<br>CCAGCACCGCGGCAAGGAAGGTGTTCACTGTATCGAGCCTGTGACATCAACACGCCAGCCCTGCTGG<br>CACCTCAAGCGGGGCTCGGAAAAGGTTGCCGATCCTGGTACTGAACCATGGCCTAGTCTCCCTTC<br>GGCCAAGATCGACCACAAGGGCTACACCCAGGAGAGGTATCCCTGTCTTGGCAGATCGACAACGGC<br>TCCACAGTCTGTGCTCCTCGGGCAGCGTGGTGCAGACACAGAGTTTATGGCCGAGCGCCCGAA<br>AGCAGAAACGGGCGTGGTGGCCAGCCTCGCGGGCAGCCGGTGGGCCCGGGCAGCGGGCGCTGTGGC<br>A<br>GGGCCGGGCACTGCGGATCCCCCAGTGGGTCTTCCATCCTGCACTGCCGCTTACACGTGGACTAC<br>GCACTCAAGGTCTGTGTGGATATCCAGGAACGTCCAAGCTGTGCTGGAGCTGCCACTGGTATCGGCA<br>CCATTCCTTGCACCTTTTGGCAGCGTCTCCAGCGTGGCAGCCACGCCAGCTTCTGCTGGACTG<br>GAGGTGGGGGCTTGCAGAGCGGCTGAGGCTCCTCCTGAGTACTCGAGGTGGTGGCCGACACTGAG<br>GAGGCAGCCTTGGGGCAGAGCCCTTCCCGTCCGAGGACCCGATGAGCCTTGAAGGCCGTTCT<br>TCGCCTACATCAAGAGTTCCGCTACCGCCCGCACCCCTGTACTGTGAGGAGGATCCAACCCACCTT<br>GGGGGACATGAGGCCGCTGCATGACTTG                                                                                                                 | NCBI Nucleotide database | NM_015683           |
| Human ARRDC3 WT | ATGGTGTGGGAAAGGTGAAGAGTTTACAATAAGCTTTGACTGTCTTAATGACAGCAATGTCCTGTGT<br>ATTCTAGTGGGATACCGTCTCAGGAAGGTAATTTAGAAGTACTGGGAAATCAGAGTAAAATCTCT<br>TAAAATTCATGCAAGAGGACATGCGAAAGTACGCTGGACTGAATCTAGAAAACCGCGCTCCAATACTGCC<br>TATACAGAAATTACACTGAAGAAGTAGAGTATTTCAACATAAAGACATCTTAATTGGGCACGAAAGAG<br>ATGATGATAATTCGAAAGGCTTCCACACTATTTCACTCAGGAAGGCATGAATATCATTACAGTTCGA<br>GCTTCCACAGACCACTCGCTACCTCATTGAAAGCCGACATGGCAGTGTGCGCTATTGGGTGAAAGCC<br>GAATTGCACAGGCTTGGCTACTACCAGTAAAATTAAGAAGGAATTTACAGTCTTTGAGCATATAGATA<br>TCAACTCTTCACTACTGTACCCCCAAGCAGGCACAAAAGAAAGACACTCTGTTGCTGGTCTGTAC<br>CTCAGGCCAATATCTTAAGTGCAAAATTAAGAAGGAAGGCTATACCCAGGTGAATCAATTCAGATA<br>TTTGTGAGATTGAGAACTGCTCTTCCGAAATGGTGGTGCAAAAGGACCAATTTACCAAACACAGGCCT<br>TCTATGCCAAAGGAAAATGAAGGAAGTAAAACAGCTTGTGGCTAACTTGCCTGGGGAATCCTTATCATC<br>TGGAAAGACAGAGACGTGGAATGGCAAGTTGCTGAAAATTCACCAAGTTTCTCCCTCTATCCTGACTGT<br>AGTATAATCCCGTGGAAATTTCACTAATGGTATATGTGGATATTCCTGGAGCTATGGATTATTTCTTA<br>ATTTGCCACTTGTGCATCGGTACCTTCTACATCCATTTGGTAGCAGAACCTCAAGTGTAAAGCAGTCA<br>GTGTAGCATGAATATGAACTGGCTCAGTTTACTTCTGAAAGACCTGAAGCACCACCCAGCTATGCA<br>GAAGTGGTAAACAGAGGAACAAAGGCGGAACAATCTTGACCAAGTGTGCTGATGACTTTGAGAGAG                                                                                                                                                                                                | NCBI Nucleotide database | NM_020801           |

|                                   |                                                                                                                                                                                                                                                                                                                                                                                                                                                                                                                                                                                                                                                                                                                                                                                                                                                                                                                                                                                                                                                                                                                                                                                                                                                                                                                         |                                |                  |
|-----------------------------------|-------------------------------------------------------------------------------------------------------------------------------------------------------------------------------------------------------------------------------------------------------------------------------------------------------------------------------------------------------------------------------------------------------------------------------------------------------------------------------------------------------------------------------------------------------------------------------------------------------------------------------------------------------------------------------------------------------------------------------------------------------------------------------------------------------------------------------------------------------------------------------------------------------------------------------------------------------------------------------------------------------------------------------------------------------------------------------------------------------------------------------------------------------------------------------------------------------------------------------------------------------------------------------------------------------------------------|--------------------------------|------------------|
|                                   | CCCTTCAAGGACCACTGTTGCATATATCCAGGAGTTTCGATTCTTGCTCCACCTCTTTATTACAGAGAT<br>TGATCCAAATCCTGATCAGTACGAGATGATAGACCATCCTGCCCTCTCGT                                                                                                                                                                                                                                                                                                                                                                                                                                                                                                                                                                                                                                                                                                                                                                                                                                                                                                                                                                                                                                                                                                                                                                                             |                                |                  |
| Human<br>ARRDC4<br>WT (1-<br>419) | ATGGGCGGGGAGGCTGGGTGCGCGGGCCGTGGGTGCCGAGGGCCGCGTGAAGAGCCTGGGTCTGGTG<br>T<br>TCGAGGACGAGCGCAAGGGCTGCTATTCCAGCGGCGAGACAGTGGCCGGGACCGTCTGAGGCGCTC<br>CGAGCCGGTGGCCCTGCGCGCGCTGCGCTGGAGGCCAGGGGCGGCCACCGCCGCTGGGGCCGAGC<br>ACCTGCCCGCGCCTCGGCCAGCACGCGGCCCTGGGTGCTTCTCGGAGGTGGAGTACCTGAACGTGC<br>GCCTCAGCCTGCGGGAGCCCCGGCCGGTGAAGGCATCATTTTATTACAGCCTGGAAAACATGAATTTCC<br>ATTTCCGTTCACTTCCATCTGAACCTTTGGTCACTCGTTTACTGGAAATATGGAAGCATTGAGTAC<br>TGTGTGGGGCAGTGTGGAAACGACCAAGGTACCTGATCAGAGTGAAGCGGGAACCTCCAGTTGTTA<br>GTCATGTCGATGTCAACACACCAGCATTATTAACCCCTGATTGAAAACCAAGAGAAAATGGTTGGCTG<br>TTGGTTTTCACTTCTGGTCCAGTCTCGCTGAGTGC AAAAATTGAAAGAAAGGGATACTGTAATGGAGAA<br>GCTATTCCAATCTATGCAGAAATAGAAAATTTTCTCTCGTCTGATTGTTCCAAAGGCTGCTATTTCC<br>AAACGCAGACATATTTGGCTAGTGAAAAACAAGACCATTGACACATGGTGCCTGCAATGTGCGAGGAAA<br>CCACATCGCTTCTGGGACACAGACATGGAATGGGAAAACGCTAAAAATCCACCTGTTACTCCATCC<br>ATCCTGGATTGCTGATTATCAGAGTGGACTATTCCTTAGCTGTATACATTACATTCTCTGGTGCTAAAA<br>AATTGATGCTCGAAGTCCATTAGTATCGGTACAATCCATATAATGGTTTTGGCAGCAGAACTCCAG<br>CATTGCCAGCCAGTTCAGTATGGATATGAGCTGGTTGACACTGACCCTGCCAGAGCAGCTGAAGCACCA<br>CCAAATATGCAGATGTGGTATCAGAGGAAGAATTCTAGACACATTCTCTTACCCTCAACCCCTCA<br>ACTGTGAGGGAGAAGTGTGCTGCTGTGTTGCTGTATACAAGAATCCGGTTTCAACCCCACTCT<br>TTATTCAGAGTTGACCCACATCTAGCGACGTAGAAGAGAGCCAGCTGTTTCTTCACTCTC  | NCBI<br>Nucleotide<br>database | NM_183376        |
| Human<br>Txnip WT                 | ATGGTGATGTTCAAGAAGTCAAGTCTTTTGGAGTGGTCTTAAACGACCCTGAAAAGGTGTACGGCAGTG<br>GCGAGAAGGTGGCTGGCCGGGTGATAGTGGAGTGTGTAAGTACTCGTGTCAAAGCCGTTAGGATCCT<br>GGCTTGGGAGTGGCTAAAGTGTCTTGGATGCAGGGATCCAGCAGTGC AAAACAGACTTCGGAGTACCTG<br>CGCTATGAAGACACGCTTCTTCTGGAAGACCAGCCAACAGGTGAGAATGAGATGGTGTATGAGACCTG<br>GAAACAAATATGAGTACAAGTTCGGCTTGGAGTCTCAGGGGCTTGGGAACATCCTTCAAAGGAAA<br>ATATGGGTGTGTAGACTACTGGGTGAAGGCTTTTCTGACCGCCGAGCCAGCCAACTCAAGAGACAAA<br>AAAACTTTGAAGTAGTGGATCTGGTGGATGTCAATACCCTGATTTAATGGCAGCTGTGTCTGCTAAA<br>AAGAAAAGAAAGTTTCTGATGTTTCTGATGGGCGGGTGTCTGTCTGCTCGAATTGACAGAAA<br>AGGATTCTGTGAAGGTGATGAGATTTCCATCCATGCTGACTTTGAGAATACATGTTCCCGAATTGTGGT<br>CCCAAAGTCCGATTTGGCCGCCACTTACCTTCCAAATGCCAGACCAAGGTGCTGACTCAGAAGT<br>TGTCACTAGTCAGAGGCAATCATATTATCTCAGGGACATGCGCATATGCGCTGGCAAGACCTTCGGGT<br>TCAGAAGATCAGGCTTCTATCTGGGCTGCAACATCCTTCGAGTTGAATTTCTTACTGATCTATGTT<br>AGCGTTCCTGGATCCAAGAAGTGTCTTACCTGACCTGCCCTGGTAATTGGCAGCAGATCAGGTCTAAGCA<br>GCAGAACATCCAGATGGCCAGCCGACAGCTCTGAGATGAGTTGGGTAGATCTGAACATCCCTGATAC<br>CCCAGAAGCTCCTCCTGCTATATGGATGCTTCTGAAGATCACCATTGGAGAGCCCAACACTCCT<br>CTGCTAGATGACATGGATGGCTCTCAAGACAGCCCTATCTTTATGTATGCCCTGAGTTCAAGTTCATGC<br>CACCACCGACTTATACTGAGGTGGATCCCTGCATCCTCAACAACATGTGCAG                                                                                    | NCBI<br>Nucleotide<br>database | NM_006472        |
| Mouse<br>ARRDC4<br>WT             | ATGGGAGGCGAGGCGGGAGCCGATGGTCTCGGGCCGTGTCAAGAGCTTGGGGCTAGTGTTCGAAGATG<br>AGAGCAAGGGCTGCTACTCAAGCGCGAGACAGTGGCCGGGACGCTGTCTGAGGCGCGAGAGCCGG<br>TGGCCCTGCGCGGACTGCGCTGGAGGCCAGGGCCGTGCCACCTCTGCTGGGGCCGAGCGCTGGGGC<br>CAGGGTCTGCATCGTGGGGGCTCTCCCGAGCTCCTCAGAAGTGAATACTTGAACCTGCGGTTGAGTC<br>TGCTGGAGGCCAGCTGGTGAAGGTGTACCTTGTACAACCAGGAAAACACGAGTTTCCCTTTGCTT<br>TCAGCTCCGCTGTAACCTTTGGCAACATCGTTTACTGGGAAGTATGGCAGTATTCAGTACTGTGTGAGG<br>GCTGTTTTGGAACGACCCCAAGTTCAGATCAGAGCGTCAAGCAGAGCTCCAGGTTGTAGTACAGTGG<br>ATGTCAACACACCCGCTTATTGACTCCTATGCTGAAGACGAGGAGAAAATGGTTGGCTGTTGGCTTTT<br>CACCTCTGGTCTGTGCTACTGAGCGTCAAGATCAGAGAAAAGGGCTACTGTAACGGAGAAGCTATCCCT<br>ATCTATGCAGAAATGAAAATGTTTCACTCCTGGTGGTTGTTCCAAAGGAGCAGCATATCCAAACCCAGA<br>CGTACTTGGCTAGTGGAAAGACAAAGACAGTCCGGCACATGGTTGCCAATGTTGAGGAAACACATTGG<br>TTCTGGGAGTACGGACACCTGGAATGGGAAGATGCTGAAGATCCACCTGTACCCCATCCATCCTGGAT<br>TGCTGCATATCAGAGTGGACTACTCCTTAGCTGTATACATTATATCCCTGGTGTAAAAGATTGATGC<br>TGGAGTGCCTTTGGTTATTGGTACAATCCATACAGTGGCTTTGGCCGAGAAAACAGCAGTGTGCGAAG<br>CCAGTTCAGTATGGACATGTGCTGGTTGGCACTGGCCCTACCGGAGCAGCCTGAAGCACCAAAATTAT<br>GCAGATGTGGTATCGGAAGAAAGAAATTTCCCGACACGTTCTCCGTACCCCTCAGCCCTGACTGTGACG<br>GGGAAGCCTGCTACTCAATGTTTGCCTGCATAACAAGAAATCCGTTTCCAGCCTCCCCCTTTATTCA<br>GGTTGATCCACATCCTGGTGTATGCCAAGAGACCCAGCCTGTATCCTTCACTCTC | NCBI<br>Nucleotide<br>database | NM_00104259<br>2 |
| Human<br>GLUT1<br>WT              | ATGGAGCCAGCAGCAAGAAGCTGACGGGTGCGCTCATGCTGGCCGTGGGAGGAGCAGTCTGGCTCCC<br>TGCAAGTTGGCTACAACACTGGAGTCAATGCCCCCAAGAGGTGATCGAGGAGTTCTACAACAGAC<br>ATGGGTCACCGCTATGGGGAGAGCATCTGCCACACAGCCTCACCACGCTCTGTTCCCTCTCAGTGGCC<br>ATCTTTTCTGTTGGGGGATGATTGGCTCCTTCTGTGGGCTTTTCTGTTAACCCTTTGGCCGGCGGA<br>ATTCAATGCTGATGATGAACCTGCTGGCTTCGTGCCCGTGTCTATGGGCTTCTGAAAACCTGGGCAA<br>GTCCTTTGAGATGCTGATCCTGGGCCCTTCACTCATCGGTGTGACTGCGGCCCTGACCACAGGCTTCGTG<br>CCCATGTATGTGGGTGAAGTGTACCCACAGCCCTTCTGGGGCCCTGGGCACCCTGCACCACTGGGCA<br>TCGTCGTCGGCATCCTCATCGCCAGGTGTTGGCTGGACTCCATCATGGGCAACAAGACCTGTGGCC<br>CCTGCTGAGCATCTTCACTCCCGCCCTGCTGCAAGTGCATCGTCTGCTGCCCTTCTGCCCCGAGAGT<br>CCCCGCTTCTGCTCATCAACCGCAACGAGGAGAACCAGGCAAGAGTGTGCTAAAGAAGCTGCGCGGGA<br>CAGCTGAGCTGACCATGACTCTGAGGAGATGAAGGAAGAGAGTCCGCAGATGATGCGGGAGAAGAGGT<br>CACCATCCTGGAGCTGTTCCGCTCCCCGCTACCGCCAGCCATCCTCATCGCTGTGGTGTGCTGACGCTG<br>TCCCAGCAGTGTCTGGCATCAACGCTGCTTCTTACTCCACGAGCATCTCGAGAAGGCGGGGTGC<br>AGCAGCCTGTGATGCAACCACTGGCTCCGGTATCGTCAACACGCGCTTCACTGTGCTGCTGTTTGT<br>GGTGGAGCGAGCAGGCGGGGACCCCTGCACCTCATAGGCTCGTGGCATGGCGGGTTGTGCCATACTC<br>ATGACCATCGCGCTAGCACTGCTGGAGCAGTACCCTGGATGCTATCTGAGCATCGTGGCCATCTTG                                                                                                                                             |                                |                  |



|                                                  |                                                                                                                                                                                                                                                                                                                                                                                                                                                                                                                                                                                                                                                                                                                                                                                                                                                                                                                                                                                                                                                                                                                                                                                                                                                                                                                                 |  |  |
|--------------------------------------------------|---------------------------------------------------------------------------------------------------------------------------------------------------------------------------------------------------------------------------------------------------------------------------------------------------------------------------------------------------------------------------------------------------------------------------------------------------------------------------------------------------------------------------------------------------------------------------------------------------------------------------------------------------------------------------------------------------------------------------------------------------------------------------------------------------------------------------------------------------------------------------------------------------------------------------------------------------------------------------------------------------------------------------------------------------------------------------------------------------------------------------------------------------------------------------------------------------------------------------------------------------------------------------------------------------------------------------------|--|--|
|                                                  | GCTATTCCAATCTATGCAGAAATAGAAAATTGTTCC                                                                                                                                                                                                                                                                                                                                                                                                                                                                                                                                                                                                                                                                                                                                                                                                                                                                                                                                                                                                                                                                                                                                                                                                                                                                                            |  |  |
| Human ARRDC4 truncation (191-419)                | ACTTCTGGTCCAGTCTCGCTGAGTGCCAAAATTGAAAGAAAGGGATACTGTAATGGAGAA<br>GCTATTCCAATCTATGCAGAAATAGAAAATTGTTCCCTCTCGTCTGATTGTTCCAAAGGCTGCTATTTCC<br>AAACGCAGACATATTTGGCTAGTGGAAAAACAAGACCATTGACACATGGTCGCCAATGTGCGAGGAAA<br>CCACATCGCTTCTGGGAGCACAGACACATGGAATGGGAAAACGCTAAAAATCCCACCTGTTACTCCATCC<br>ATCCTGGATTGCTGCATTATCAGAGTGGACTATTCCTTAGCTGTATACATTACATTCTGGTGCTAAAA<br>AATTGATGCTCGAACTGCCATTAGTATCGGTACAATCCATATAATGGTTTTGGCAGCAGAAACTCCAG<br>CATTGCCAGCCAGTTCAGTATGGATATGAGCTGGTTGACACTGACCCTGCCAGAGCAGCCTGAAGCACCA<br>CCAAATATGCAGATGGTATCAGAGGAAGAATTCTAGACACATTCTCTTACCCTCAACCCCTA<br>ACTGTGAGGGAGAAGTGTCTGCTGTGTTTTGCCTGTATACAAGAATTCCGGTTTTCAACCCCACTCT<br>TTATTAGAGGTTGACCCACATCCTAGCGACGTAGAAGAGAGCCAGCCTGTTTCTTCTTCTC                                                                                                                                                                                                                                                                                                                                                                                                                                                                                                                                                                                                    |  |  |
| Human ARRDC4 truncation (191-318)                | ACTTCTGGTCCAGTCTCGCTGAGTGCCAAAATTGAAAGAAAGGGATACTGTAATGGAGAA<br>GCTATTCCAATCTATGCAGAAATAGAAAATTGTTCCCTCTCGTCTGATTGTTCCAAAGGCTGCTATTTCC<br>AAACGCAGACATATTTGGCTAGTGGAAAAACAAGACCATTGACACATGGTCGCCAATGTGCGAGGAAA<br>CCACATCGCTTCTGGGAGCACAGACACATGGAATGGGAAAACGCTAAAAATCCCACCTGTTACTCCATCC<br>ATCCTGGATTGCTGCATTATCAGAGTGGACTATTCCTTAGCTGTATACATTACATTCTGGTGCTAAAA<br>AATTGATGCTCGAACTGCCATTAGTATCGGTACAATCCATAT                                                                                                                                                                                                                                                                                                                                                                                                                                                                                                                                                                                                                                                                                                                                                                                                                                                                                                                  |  |  |
| Human ARRDC4 truncation (319-419)                | AATGGTTTTGGCAGCAGAACTCCAGCATTGCCAGCCAGTTCAGTATGGATATGAGCTGGTTGACACTGACC<br>CTGCCAGAGCAGCTGAAGCACCACCAAAATATGCAGATGGTATCAGAGGAAGAATTCTAGACACATT<br>CCTCCTTACCCTCAACCCCTAACTGTGAGGGAGAAGTGTCTGCTGTGTTTTGCCTGTATACAAGAATTCC<br>GGTTTTCAACCCCACTCTTATTAGAGGTTGACCCACATCCTAGCGACGTAGAAGAGAGCCAGCCTGTTTC<br>CTTCTTCTC                                                                                                                                                                                                                                                                                                                                                                                                                                                                                                                                                                                                                                                                                                                                                                                                                                                                                                                                                                                                                 |  |  |
| Human ARRDC4 C domain mutant of conserved motifs | ATGGGCGGGGAGGCTGGGTGCGCGCGCGCCGTGGGTGCCGAGGGCCGCGTGAAGAGCCTGGGTCTGGTG<br>TTCGAGGACGAGCGCAAGGGCTGCTATTCAGCGGCGAGACAGTGGCCGGGCACGTGCTGCTGGAGGCGT<br>CCGAGCCGGTGGCCCTGCGCGCGTGGCCTGGAGGCCAGGGGCGCGCCACCGCCGCTGGGGCCCGAG<br>CACCTGCCCGCGCCTCGGCCAGCACCGCGGCCCTGGCTGTCTTCTCGGAGGTGGAGTACCTGAACGTGCG<br>CCTCAGCCTGCGGGAGCCCCGCGCGGTGAAGGCATATTTATTACAGCCTGGAAAACATGAATTTCCATTT<br>CGCTTTCAACTTCCATCTGAACCTTTGGTCACTCGTTTACTGGGAAATATGGAAGCATTAGTACTGTGTGC<br>GGGAGTGTGGAAACGACCCAAGGTACCTGATCAGAGTGTAAAGCGGGAACCTCCAGGTTGTTAGTCATGTC<br>GATGTCAACACACCAGCATTATTAACCCCTGTATTGAAAACCAAGAGAAAATGGTTGGCTGTTGGTTTTCA<br>CTTCTGGTCCAGTCTCGCTGAGTGCCAAAATTGAAAGAAAGGGATACGCTAATGGAGAAGCTATTCCAATCT<br>ATGCAGAAATAGAAAATTGTTCTCTCGTCTGATTGTTCCAAAGGCTGCTATTTTCCAAACGAGACAGCTGC<br>GGCTAGTGGAAAAGCAAAGACATTCGACACATGGTCGCCAATGCGCAGGAGCCGCGCCGCTTCTGGGA<br>GCACAGACATGGAATGGGAAAGCGCTAAAAATCCCACCTGTTACTCCATCCATCCTGGATTGCTGCATTAT<br>CAGAGTGGACTATTCCTTAGCTGTATACATTACATTCTGGTGTGACGATTGATGCTCGAACTGCCATTA<br>GTGATCGGTACAATCCATATAATGGTTTTGGCAGCAGAACTCCAGCATTGCCAGCCAGTTCAGTATGGAT<br>ATGAGCTGGTTGACACTGACCCTGCCAGAGCAGCTGAAGCACCACCAAAATATGCAGATGGTATCAGAG<br>GAAGAATTCTAGACACATTCTCCTTACCCTCAACCCCTAACTGTGAGGGAGAAGTGTGCTGCTGTGT<br>TTGCTGTATACAAGAATTCGGTTTTCAACCCCACTCTTATTAGAGGTTGACCCACATCCTAGCGACGTA<br>GAAGAGAGCCAGCCTGTTTCTTCTTCTC |  |  |
| Interaction-defect Human ARRDC4                  | ATGGGCGGGGAGGCTGGGTGCGCGCGCGCCGTGGGTGCCGAGGGCCGCGTGAAGAGCCTGGGTCTGGTG<br>TTCGAGGACGAGCGCAAGGGCTGCTATTCAGCGGCGAGACAGTGGCCGGGCACGTGCTGCTGGAGGCGT<br>CCGAGCCGGTGGCCCTGCGCGCGTGGCCTGGAGGCCAGGGGCGCGCCACCGCCGCTGGGGCCCGAG<br>CACCTGCCCGCGCCTCGGCCAGCACCGCGGCCCTGGCTGTCTTCTCGGAGGTGGAGTACCTGAACGTGCG<br>CCTCAGCCTGCGGGAGCCCCGCGCGGTGAAGGCATATTTATTACAGCCTGGAAAACATGAATTTCCATTT<br>CGCTTTCAACTTCCATCTGAACCTTTGGTCACTCGTTTACTGGGAAATATGGAAGCATTAGTACTGTGTGC<br>GGGAGTGTGGAAACGACCCAAGGTACCTGATCAGAGTGTAAAGCGGGAACCTCCAGGTTGTTAGTCATGTC<br>GATGTCAACACACCAGCATTATTAACCCCTGTATTGAAAACCAAGAGAAAATGGTTGGCTGTTGGTTTTCA<br>CTTCTGGTCCAGTCTCGCTGAGTGCCAAAATTGAAAGAAAGGGATACTGTAATGGAGAAGCTATTCCAATCT<br>ATGCAGAAATAGAAAATTGTTCTCTCGTCTGATTGTTCCAAAGGCTGCTATTTTCCAAACGAGACATATTT<br>GGCTAGTGGAGCAGCAAAGACCATTGACACATGGTCGCCAATGTGCGAGGAAACCATCGCTTCTGGGA<br>GCACAGACATGGAATGGGAAAACGCTAAAAATCCCACCTGTTACTCCATCCATCCTGGATTGCTGCATTAT<br>CAGAGTGGCTATTCTTAGCTGTATACATTACATTCTGGTGTGCTGCTGCAACTGCCATTA<br>GTGATCGGTACAATCCATATAATGGTTTTGGCAGCAGAACTCCAGCATTGCCAGCCAGTTCAGTATGGAT<br>ATGAGCTGGTTGACACTGACCCTGCCAGAGCAGCTGAAGCACCACCAAAATATGCAGATGGTATCAGAG<br>GAAGAATTCTAGACACATTCTCCTTACCCTCAACCCCTAACTGTGAGGGAGAAGTGTGCTGCTGTGT<br>TTGCTGTATACAAGAATTCGGTTTTCAACCCCACTCTTATTAGAGGTTGACCCACATCCTAGCGACGTA<br>GAAGAGAGCCAGCCTGTTTCTTCTTCTC          |  |  |
| PCR primers for the ARRDC4 KO allele             | F (forward) 5'-AAGTATGCGTTTGAAGGAGTTAGGG-3'<br>R1 (reverse) 5'- CAAGTGGAGACCTCCAGAGAATGTAG-3'<br>R2 (reverse) 5'- TTGACTAGAACATGAACCTGTGGCTGC-3'                                                                                                                                                                                                                                                                                                                                                                                                                                                                                                                                                                                                                                                                                                                                                                                                                                                                                                                                                                                                                                                                                                                                                                                |  |  |
|                                                  |                                                                                                                                                                                                                                                                                                                                                                                                                                                                                                                                                                                                                                                                                                                                                                                                                                                                                                                                                                                                                                                                                                                                                                                                                                                                                                                                 |  |  |

**Cultured Cells**

DOI [to be added]

| Name          | Vendor or Source | Sex (F, M, or unknown) | Persistent ID / URL |
|---------------|------------------|------------------------|---------------------|
| HEK 293 cell  | ATCC             |                        |                     |
| HEK 293T cell | ATCC             |                        |                     |
| HT 1080 cell  | ATCC             |                        |                     |

### Data & Code Availability

| Description                           | Source / Repository     | Persistent ID / URL         |
|---------------------------------------|-------------------------|-----------------------------|
| ARRDC4 knock out Mouse Heart Analysis | Gene Expression Omnibus | Accession number: GSE186336 |

### Other

| Description                                                          | Source / Repository      | Persistent ID / URL |
|----------------------------------------------------------------------|--------------------------|---------------------|
| ATF4 (primer, FAM, human)                                            | Thermo Fisher scientific | Hs00909569_g1       |
| ATF4 (primer, FAM, mouse)                                            | Thermo Fisher scientific | Mm00515324_m1       |
| ATF6 (primer, FAM, human)                                            | Thermo Fisher scientific | Hs00232586_m1       |
| ATF6 (primer, FAM, mouse)                                            | Thermo Fisher scientific | Mm01295317_m1       |
| XBP1 (primer, FAM, human)                                            | Thermo Fisher scientific | Hs00231936_m1       |
| XBP1 (primer, FAM, mouse)                                            | Thermo Fisher scientific | Mm00457357_m1       |
| CHOP (primer, FAM, human)                                            | Thermo Fisher scientific | Hs00358796_g1       |
| CHOP (primer, FAM, mouse)                                            | Thermo Fisher scientific | Mm00492097_m1       |
| GAPDH (primer, FAM, human)                                           | Thermo Fisher scientific | Hs02786624_g1       |
| GAPDH (primer, FAM, mouse)                                           | Thermo Fisher scientific | Mm99999915_g1       |
| ARRDC4 (primer, FAM, human)                                          | Thermo Fisher scientific | Hs00411771_m1       |
| ARRDC4 (primer, FAM, mouse)                                          | Thermo Fisher scientific | Mm00508442_m1       |
| BNP (primer, FAM, mouse)                                             | Thermo Fisher scientific | Mm01255770_g1       |
| COL1A1 (primer, FAM, mouse)                                          | Thermo Fisher scientific | Mm00801666_g1       |
| COL3A3 (primer, FAM, mouse)                                          | Thermo Fisher scientific | Mm00802331_m1       |
| ARRDC4 siRNA                                                         | Thermo Fisher scientific | 4392422 (S40820)    |
| Negative control siRNA                                               | Thermo Fisher scientific | 4390843             |
| Dynamin inhibitor (Dyngo® 4a)                                        | Abcam                    | ab120689            |
| GlcNac (N-Acetyl-D-glucosamine)                                      | Sigma-Aldrich            | A8625               |
| UDP-GlcNac<br>(Uridine 5'-diphospho-N-acetylglucosamine sodium salt) | Sigma-Aldrich            | U4375               |
| L-(+)-Lactic acid solution                                           | Sigma-Aldrich            | 199257              |
| pCDH-CMV-MCS-EF1-GFP-T2A-Puro                                        | System Biosciences       |                     |
| pEGFP-C3                                                             | Clontech                 |                     |
| ERAI ER Stress Detector HD                                           | Cosmo Bio                | STDTC-1             |
| OKD Oxidative Stress Detector                                        | Cosmo Bio                | STDTC-3             |
| PureFection™ Transfection Reagent                                    | System Biosciences       | LV750A              |
| MagStrep "type3" Strep-Tactin® beads                                 | IBA Lifesciences         | 2-1613-002          |
| CellBrite® Blue                                                      | Biotium                  | 30024               |
| Pitstop®2, clathrin inhibitor                                        | Abcam                    | ab120687            |
| Pitstop®2, clathrin inhibitor-negative control                       | Abcam                    | ab120688            |

## ARRIVE GUIDELINES

The ARRIVE guidelines (<https://arriveguidelines.org/>) are a checklist of recommendations to improve the reporting of research involving animals. Key elements of the study design should be included below to better enable readers to scrutinize the research adequately, evaluate its methodological rigor, and reproduce the methods or findings.

### Study Design

| Groups  | Sex | Age     | Number (prior to experiment) | Number (after termination) | Littermates (Yes/No) | Other description        |
|---------|-----|---------|------------------------------|----------------------------|----------------------|--------------------------|
| Group 1 | M/F | 12-week | 16/14                        | 30                         | Yes                  | Sham surgery (WT)        |
| Group 2 | M/F | 12-week | 15/15                        | 30                         | Yes                  | Sham surgery (ARRDC4 KO) |
| Group 3 | M/F | 12-week | 28/30                        | 58                         | Yes                  | MI surgery (WT)          |
| Group 4 | M/F | 12-week | 28/29                        | 57                         | Yes                  | MI surgery (ARRDC4 KO)   |

**Sample Size:** Please explain how the sample size was decided Please provide details of any *prior* sample size calculation, if done.

Sample size for MI surgery was calculated as n=20/per group using G\*Power 3.1.9.2 with two-tail,  $\alpha$ -error = 0.05, Power = 0.8, Effect size d = 1.0, and allocation ratio between two groups = 1.0. Taking into account for technical dropouts, the number of experiment was set with a minimum of n=20 per group.

5% difference of infarct size between the two groups and the standard deviation = 5% based on our previous report (J Mol Cell Cardiol. 2021 Jun;155:36-49. doi: 10.1016/j.yjmcc.2021.02.013.PMID: 33652022 ) were used for Effect size d estimation.

### Inclusion Criteria

Animals were genotypes between 2 wks and 3 wks of age, and only homozygous or wild-type mice were included. Both genders aged 12 wks old were included for the study of the MI or sham procedures.

### Exclusion Criteria

All heterozygous mice were excluded and used as breeding pairs.

Any animal showing signs of distress (extreme lethargy, wounds or ulcers) were planned to be immediately sacrificed. During and after the procedure, we monitored the level of pain/distress for mice. If any clinical signs were detected, we would have stopped the procedure. If the condition was severe, the animals would have been euthanized. However, we did not experience any of the above.

### Randomization

The study was randomly performed.

### Blinding

Some studies were unbiased in nature (RNAseq, qPCR, biochemical assays etc). In those cases, we performed under non-blinded manner.
