# Supplementary material
Source: PubMed Central journal article supplement (PMC9444972)

Full unedited gels for Figure 1B

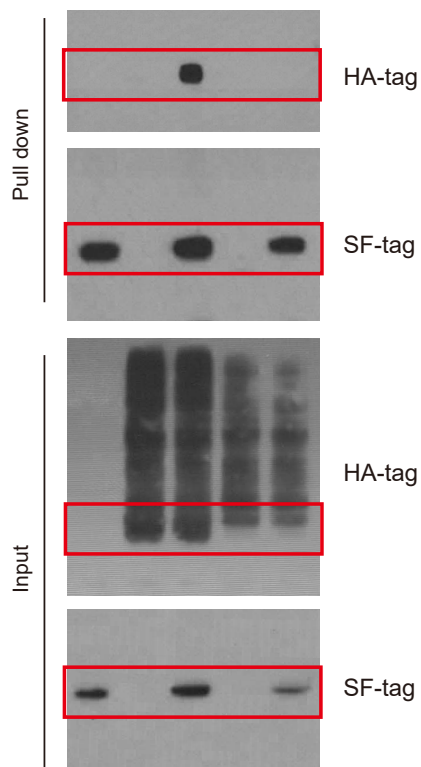

Full unedited gels for Figure 1D

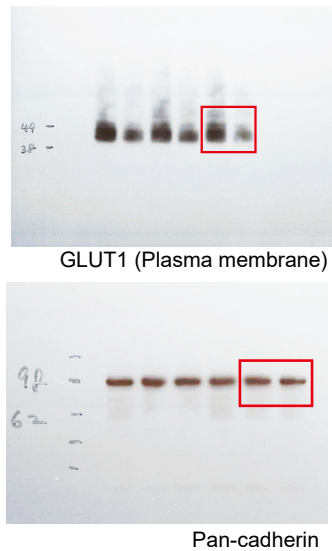

Full unedited gels for Figure 5K

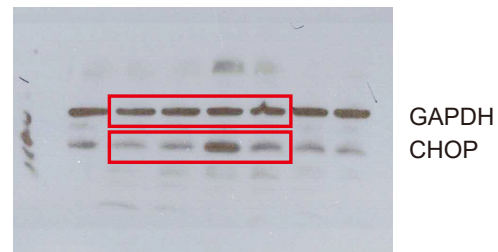

Full unedited gels for Figure 6C

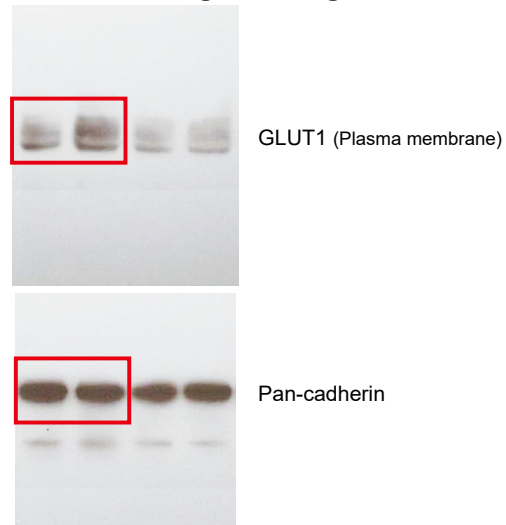

Full unedited gels for Figure 2K

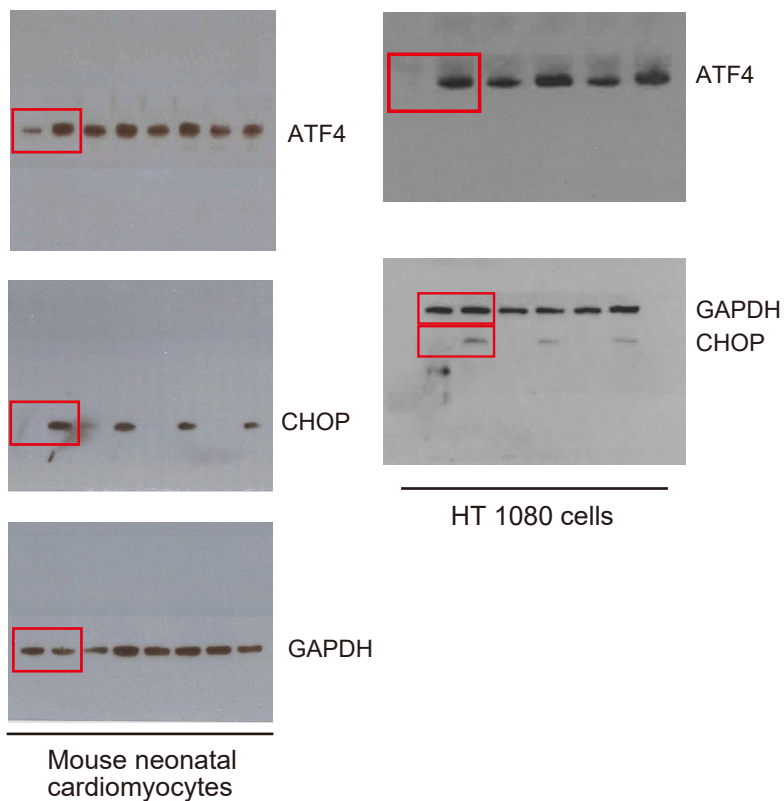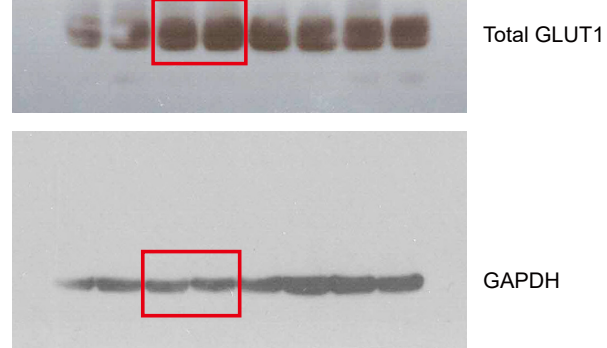

Full unedited gels for Figure 7B

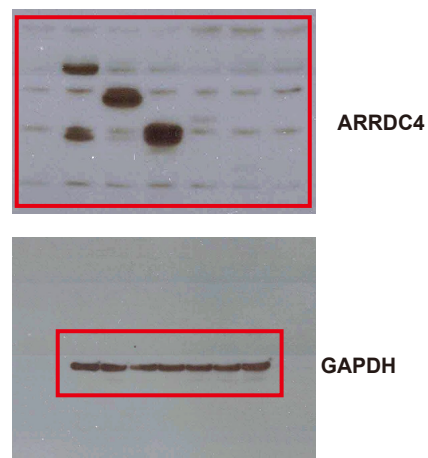

Full unedited gels for Figure 7C

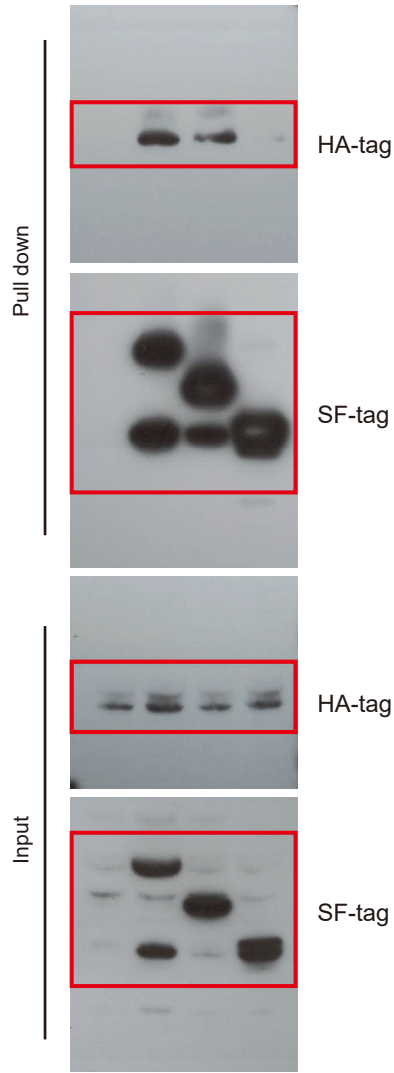

Full unedited gels for Figure 7E

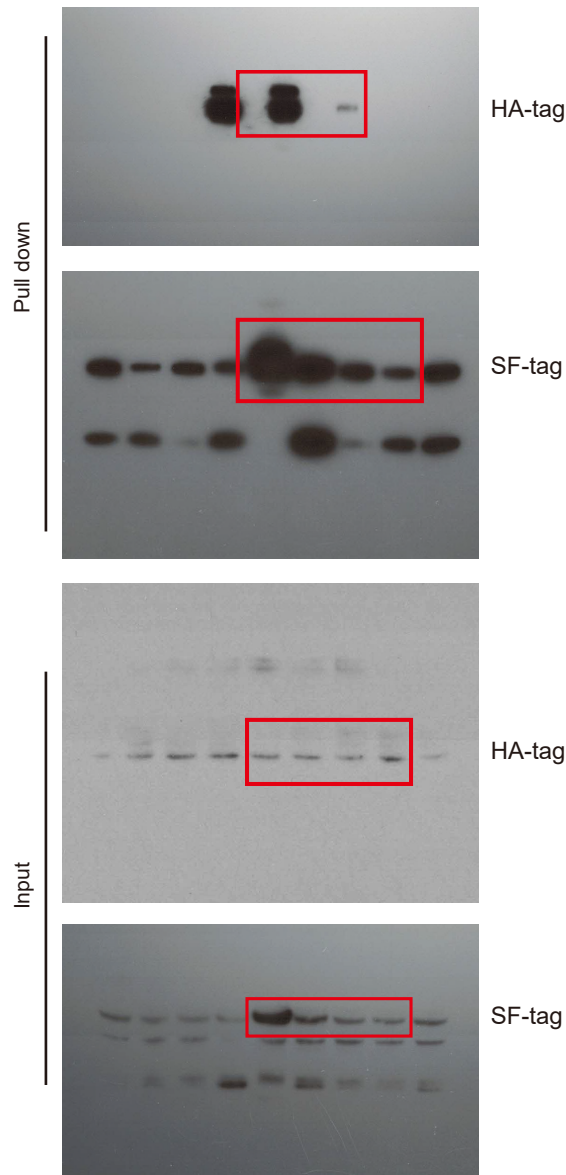

Full unedited gels for Figure 7J

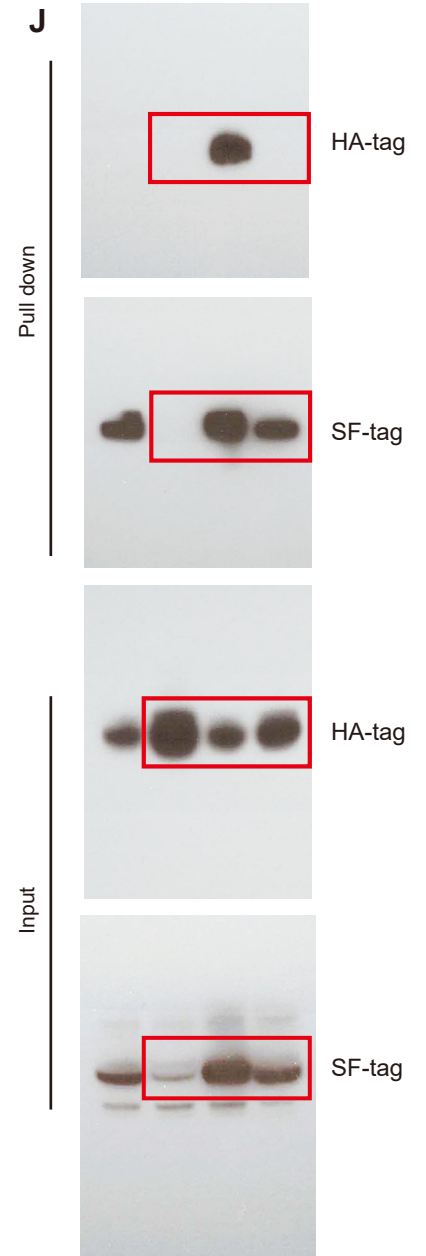

Full unedited gels for Figure S1A

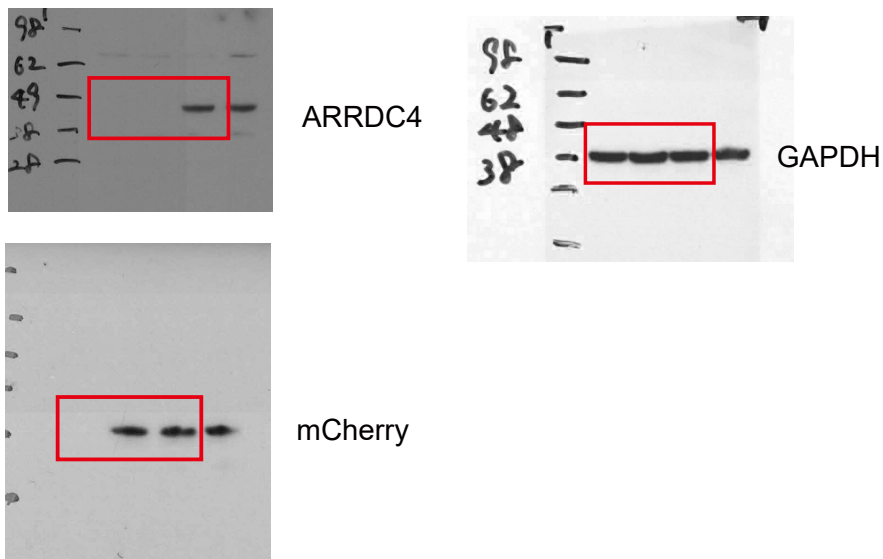

Supplement: NIHMS1827721-supplement-uncut_gels.pdf [file NIHMS1827721-supplement-uncut_gels.pdf]
